# Supplementary material for: Simultaneous Qualitative and Quantitative Analyses of 41 Constituents in <em>Uvaria macrophylla </em>Leaves Screen Antioxidant Quality‐Markers Using Database‐ Affinity UHPLC‐Q‐Orbitrap‐MS/MS
Source: Preprints.org preprint supplement (doi:10.20944/preprints202410.0270.v1), 2024-10-03
Supplement: Supplementary file 1 [file supplementary]

*Suppl. 18 Identification of 1,2,3,4,6-penta-O-galloyl-β-D-glucopyranose (CAS 14937-32-7, C41H32O26, M.W. 940.68)*


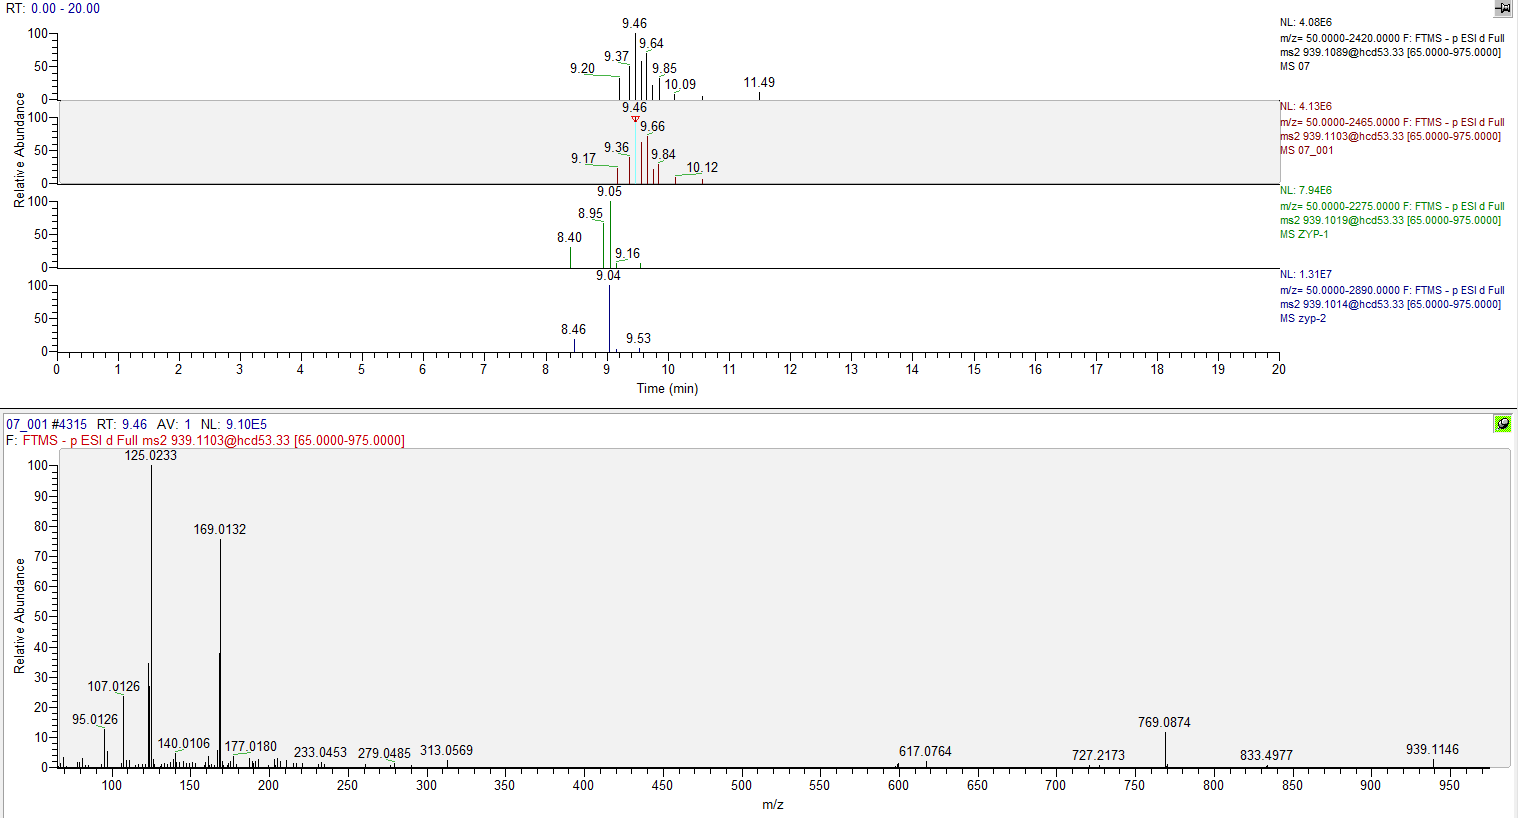

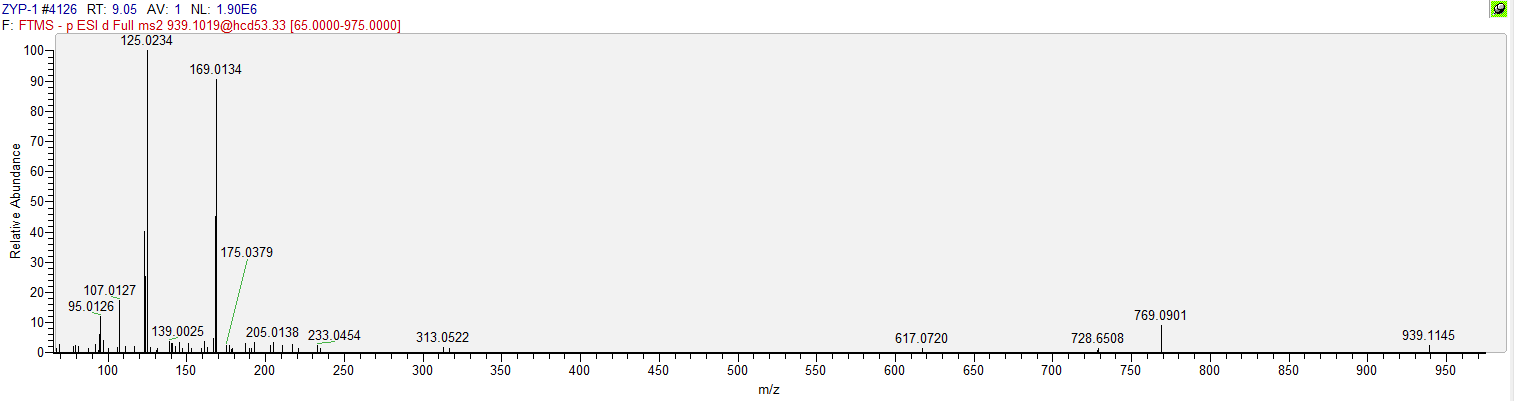


**A**

**B**

Fig. S18 The main results of standard 1,2,3,4,6-penta-O-galloyl-β-D-glucopyranose (CAS 14937-32-7, C41H32O26) and its corresponding peak in the TIC diagram using UPLC-Q-Orbitrap-MS analysis. (**A**) The MS/MS fragments of standard 1,2,3,4,6-penta-O-galloyl-β-D-glucopyranose. (**B**) The MS/MS spectra from chromatographic peak in the *Uvaria macrophylla Roxburg* leaves extract.

**Note:** The *m/z* values in purple are the calculated ones. The *m/z* calculation was based on the relative atomic masses of C (12.0000), H (1.007825), O (15.994915), and N (14.003074)[1].

**Identification:** As seen in Fig. S18, the R.T. value, molecular ion peak, MS/MS spectra, and characteristic pears were highly similar. Thus, the chromatographic peak in the in the *Uvaria macrophylla Roxburg* leaves extract was identified as 1,2,3,4,6-penta-O-galloyl-β-D-glucopyranose (CAS 14937-32-7, C41H32O26).

**References**

[1] Gross., J.H. Mass spectrometry*, Beijing: Science pre*ss**. 20**13.
